# Supplementary material
Source: publisher figshare collection journal article supplement (https://acs.figshare.com/ndownloader/files/4099696)
Supplement: Supplementary file 1 [file 4099696]

# Discerning the origins of the amplitude fluctuations in dynamic Raman NanoSpectroscopy

Jérémie Margueritat,<sup>†,¶</sup> Alexandre Bouhelier,<sup>†</sup> Laurent Markey,<sup>†</sup> Gérard Colas des  
Francs,<sup>†</sup> Alain Dereux,<sup>†</sup> Stéphanie Lau-Truong,<sup>‡</sup> Johan Grand,<sup>‡</sup> Georges Lévi,<sup>‡</sup>  
Nordin Félidj,<sup>‡</sup> Jean Aubard,<sup>‡</sup> and Eric Finot<sup>\*,†</sup>

*Laboratoire Interdisciplinaire Carnot de Bourgogne, UMR 6303 CNRS, Université de Bourgogne,  
9 Avenue A. Savary, F-21078, Dijon, France*

*, and Interfaces, Traitements, Organisations et Dynamique des Systèmes, Université Paris7-Denis  
Diderot, UMR 7086 CNRS, Bâtiment Lavoisier, 15 rue Jean de Baïf, F-75205 Paris, France*

E-mail: eric.finot@u-bourgogne.fr

---

<sup>\*</sup>To whom correspondence should be addressed

<sup>†</sup>Université de Bourgogne

<sup>‡</sup>Université Paris7-Denis Diderot

<sup>¶</sup>current address : LPCML-UMR 5620 CNRS / UCBL, 10 rue Ada Byron F-69622, Villeurbanne, France

## Assignment of Raman lines

**Table 1:** BT indicates *Benzene Thiol*; this molecule is chemisorbed dissociatively onto gold NPs and SERS spectra are related to benzenethiolate which is the species bound to gold via its sulfur atom ( from ref [17]).*Citrate species* indicate either adsorbed citrate (I) or its main oxydation product namely, acetone dicarboxylic acid (II) (from ref [15]). s, m, w indicate relative intensities as strong, medium and weak, respectively

| SERS Spectra<br>from Fig.2c<br>and Fig.4(Q)<br>Raman shift ( $cm^{-1}$ ) | Relative<br>Intensity | Possible<br>species<br>assignment |
|--------------------------------------------------------------------------|-----------------------|-----------------------------------|
| 1700                                                                     | m                     | <i>Citrate species</i> (II)       |
| 1620                                                                     | m                     | <i>Citrate species</i> (II)       |
| 1580/1560                                                                | m                     | <i>Citrate species</i> (I+II)     |
| 1540                                                                     | s                     | <b>BT</b>                         |
| 1485                                                                     | m-w                   | <b>BT</b>                         |
| 1450                                                                     | m-w                   | <i>Citrate species</i> (I+II)     |
| 1410                                                                     | m-w                   | Citrate species (II)              |
| 1350                                                                     | m-w                   | <i>Citrate species</i> (I+II)     |
| 1300                                                                     | m                     | <i>Citrate species</i> (I+II)     |
| 1250                                                                     | m-w                   | <i>Citrate species</i> (I+II)     |
| 1200                                                                     | m                     | <i>Citrate species</i> (I+II)     |
| 1130                                                                     | m-w                   | <i>Citrate species</i> (I+II)     |
| 1095                                                                     | m-s                   | <b>BT</b>                         |
| 1020                                                                     | m-w                   | <b>BT</b>                         |
| 992                                                                      | m-s                   | <b>BT</b>                         |
| 950                                                                      | m-s                   | <i>Citrate species</i> (I+II)     |

## Statistical treatment of spectra

The probability density functions  $p_v(A_v)$  of the photon rates  $A_v$  were estimated experimentally for each wavenumber  $v$ . Histograms were built using a bin number  $n$  defined by the root of the number  $N$  of acquired spectra and bin sizes  $\Delta A_v$  obtained by the intervals between the minimum  $A_{min,v}$  and the maximum  $A_{max,v}$  of the photon rates.

$$n = \sqrt{N} \quad (1)$$

$$\Delta A_v = \frac{A_{max,v} - A_{min,v}}{n} \quad (2)$$

$p_v(A_v)$  are defined by the number of events  $n_v(A_v)$  having its photon rate  $A_v$  comprised in the interval between  $A_v$  and  $A_v + \Delta A_v$  and divided by  $n$  and  $\Delta A_v$ .

$$p_v(A_v) = \frac{n_v(A_v)}{\Delta A_v n} \quad (3)$$

Hence, the integral of  $p_v(A_v)$  over the entire range of photon rates  $A_v$  is equal to one. The variance  $\sigma_v^2(A_v)$  is used to describe how far  $A_v(i)$  lies from the mean  $\langle A_v \rangle$

$$\langle A_v \rangle = \sum_{i=1}^n p_v(i) A_v(i) \quad (4)$$

$$\sigma_v^2 = \sum_{i=1}^n p_v(i) (A_v(i) - \langle A_v \rangle)^2 \quad (5)$$

The relative standard deviation  $RSD$  was used to express the chance occurrence of the Raman line.

$$RSD_v = \frac{\sigma_v}{\langle A_v \rangle} \quad (6)$$

## Log Logistic distribution

The log logistic distribution is similar in shape to the log-normal distribution (geometric Brownian motion) but is used to describe heavier tails. The log-logistic distribution, sometimes known as the Fisk distribution, is encountered in a variety of fields (economy, biology, physics) to analyse life time data. The log-logistic distribution was applied successfully to describe a process that is the product of a number of variables of small amplitude, namely we attempt to describe the process as a coupling between the substrate properties (EM field or electron tunnelling) and the molecular Raman scattering. The two-parameters log logistic distribution is described by its theoretical power density function  $p_{theo,v}(A_v)$ .

$$p_{theo,v}(A_v) = \frac{\frac{\beta}{\alpha}(\frac{A_v}{\alpha})^{\beta-1}}{(1 + (\frac{A_v}{\alpha})^\beta)^2} \quad (7)$$

and its cumulative density function  $F_{theo,v}(A_v)$

$$F_{theo,v}(A_v) = \sum_{j=1}^{A_v} p_{theo,v}(j) \Delta A_v = \frac{1}{(1 + \frac{A_v}{\alpha})^{-\beta}} \quad (8)$$

$\alpha$  is a scale parameter that corresponds to the median of the distribution (i.e. the value of  $A_v$  having  $F(A_v)=0.5$ ). Note that the median is less sensitive to the extreme values compared to the mean.  $\alpha_v$  is obtained by the following relations :

$$\alpha_v = \frac{\sin b}{b} \langle A_v \rangle \quad (9)$$

where  $b$  is obtained by solving the equation :

$$RSD_v^2 = \frac{2b}{\sin 2b} - \frac{b^2}{\sin b} \quad (10)$$

The shape parameter  $\beta_v$  can be deduced from  $b$

$$\beta_v = \frac{\pi}{b} \quad (11)$$

When  $\beta_v$  is high,  $\alpha_v$  tends to  $\langle I_v \rangle$ . Note that  $\alpha_v$  tends to the infinity when  $\beta_v$  approaches the value of 2.
